# Supplementary material
Source: PubMed Central journal article supplement (PMC4145014)
Supplement: NIHMS578631-supplement-01.pdf [file NIHMS578631-supplement-01.pdf]

**Table 2. Incidence of Age-Related Macular Degeneration among AGES Participants who Completed both Retinal Examinations (N=2868)**

| Baseline Characteristic             | No. at Risk* | Incidence % (N) |           |             |
|-------------------------------------|--------------|-----------------|-----------|-------------|
|                                     |              | Early AMD       | Late AMD  | Any AMD     |
| Overall                             | 2196         | 14.2% (312)     | 0.7% (16) | 14.9% (328) |
| Age                                 |              |                 |           |             |
| ≤ 69 years                          | 349          | 6.9% (24)       | 0.3% (1)  | 7.2% (25)   |
| 70-74 years                         | 939          | 10.3% (97)      | 0.4% (4)  | 10.8% (101) |
| 75-79 years                         | 611          | 16.4% (100)     | 1.5% (9)  | 17.8% (109) |
| 80-84 years                         | 253          | 29.3% (74)      | 0.8% (2)  | 30.0% (76)  |
| 85+ years                           | 44           | 38.6% (17)      | 0.0% (0)  | 38.6% (17)  |
| Sex                                 |              |                 |           |             |
| Men                                 | 939          | 12.3% (115)     | 0.6% (6)  | 12.9% (121) |
| Women                               | 1257         | 15.7% (197)     | 0.8% (10) | 16.5% (207) |
| Smoking Status                      |              |                 |           |             |
| Never Smokers                       | 965          | 13.2% (127)     | 0.5% (5)  | 13.7% (132) |
| Former Smokers                      | 994          | 14.6% (145)     | 0.9% (9)  | 15.5% (154) |
| Current Smokers                     | 237          | 16.9% (40)      | 0.8% (2)  | 17.7% (42)  |
| Cod Liver Oil Use                   |              |                 |           |             |
| Absent                              | 907          | 14.1% (128)     | 0.7% (6)  | 14.8% (134) |
| Present                             | 1289         | 14.3% (184)     | 0.8% (10) | 15.1% (194) |
| Hypertension                        |              |                 |           |             |
| Absent                              | 479          | 12.9% (62)      | 0.6% (3)  | 13.6% (65)  |
| Present                             | 1716         | 14.6% (250)     | 0.8% (13) | 15.3% (263) |
| Pulse Pressure, as quartiles        |              |                 |           |             |
| Q1 (< 55 mmHg)                      | 553          | 10.9% (60)      | 0.7% (4)  | 11.6% (64)  |
| Q2 (55-64 mmHg)                     | 522          | 15.7% (82)      | 0.8% (4)  | 16.5% (86)  |
| Q3 (65-76 mmHg)                     | 560          | 13.8% (77)      | 0.7% (4)  | 14.5% (81)  |
| Q4 (> 76 mmHg)                      | 560          | 16.6% (93)      | 0.7% (4)  | 17.3% (97)  |
| Diabetes                            |              |                 |           |             |
| Absent                              | 1988         | 14.1% (280)     | 0.8% (16) | 14.9% (296) |
| Present                             | 208          | 15.4% (32)      | 0.0% (0)  | 15.4% (32)  |
| BMI, as quartiles                   |              |                 |           |             |
| Q1 (< 24.39 kg/m <sup>2</sup> )     | 538          | 12.3% (66)      | 0.6% (3)  | 12.8% (69)  |
| Q2 (24.39-26.95 kg/m <sup>2</sup> ) | 560          | 14.8% (83)      | 0.5% (3)  | 15.4% (86)  |
| Q3 (26.96-29.68 kg/m <sup>2</sup> ) | 535          | 14.2% (76)      | 0.9% (5)  | 15.1% (81)  |
| Q4 (> 29.68 kg/m <sup>2</sup> )     | 563          | 15.5% (87)      | 0.9% (5)  | 16.3% (92)  |
| Total Cholesterol, as quartiles     |              |                 |           |             |
| Q1 (< 4.9 mmol/L)                   | 539          | 14.1% (76)      | 0.7% (4)  | 14.8% (80)  |
| Q2 (4.9-5.5 mmol/L)                 | 538          | 14.7% (79)      | 0.6% (3)  | 15.2% (82)  |
| Q3 (5.6-6.3 mmol/L)                 | 557          | 13.1% (73)      | 0.7% (4)  | 13.8% (77)  |
| Q4 (> 6.3 mmol/L)                   | 562          | 15.0% (84)      | 0.9% (5)  | 15.8% (89)  |
| HDL Cholesterol, as quartiles       |              |                 |           |             |
| Q1 (< 1.27 mmol/L)                  | 572          | 11.2% (64)      | 0.9% (5)  | 12.1% (69)  |
| Q2 (1.28-1.52 mmol/L)               | 539          | 14.3% (77)      | 0.6% (3)  | 14.8% (80)  |
| Q3 (1.53-1.83 mmol/L)               | 551          | 13.8% (76)      | 0.7% (4)  | 14.5% (80)  |
| Q4 (> 1.83 mmol/L)                  | 534          | 17.8% (95)      | 0.8% (4)  | 18.5% (99)  |
| C-Reactive Protein                  |              |                 |           |             |
| Low (< 1 mg/L)                      | 581          | 12.6% (73)      | 1.0% (6)  | 13.6% (79)  |
| Moderate (1-3 mg/L)                 | 983          | 14.7% (144)     | 0.3% (3)  | 15.0% (147) |
| High (> 3 mg/L)                     | 631          | 15.1% (95)      | 1.1% (7)  | 16.2% (102) |

AGES=Age, Gene/Environment Susceptibility-Reykjavik Study; AMD=age-related macular degeneration; BMI=body mass index; HDL=high-density lipoprotein

Incidence defined as exhibiting no AMD at baseline examination but presenting with AMD (early or late) at the follow-up examination.

\* Participants exhibited no AMD at baseline examination.
