# Supplementary material
Source: PubMed Central journal article supplement (PMC4145014)
Supplement: NIHMS578631-supplement-02.pdf [file NIHMS578631-supplement-02.pdf]

**Table 4. Progression to Late Age-Related Macular Degeneration from Early Age-Related Macular Degeneration among AGES participants who Completed both Retinal Examinations (N=2868)**

| Baseline Characteristic             | No. at Risk* | Late AMD % (N) |
|-------------------------------------|--------------|----------------|
| Overall                             | 563          | 22.7% (128)    |
| Age                                 |              |                |
| ≤ 69 years                          | 47           | 12.8% (6)      |
| 70-74 years                         | 144          | 11.8% (17)     |
| 75-79 years                         | 190          | 24.7% (47)     |
| 80-84 years                         | 159          | 32.7% (52)     |
| 85+ years                           | 23           | 26.1% (6)      |
| Sex                                 |              |                |
| Men                                 | 239          | 18.0% (43)     |
| Women                               | 324          | 26.2% (85)     |
| Smoking Status                      |              |                |
| Never Smokers                       | 234          | 23.9% (56)     |
| Former Smokers                      | 265          | 21.5% (57)     |
| Current Smokers                     | 63           | 23.8% (15)     |
| Cod Liver Oil Use                   |              |                |
| Absent                              | 233          | 25.3% (59)     |
| Present                             | 330          | 20.9% (69)     |
| Hypertension                        |              |                |
| Absent                              | 112          | 23.2% (26)     |
| Present                             | 451          | 22.6% (102)    |
| Pulse Pressure, as quartiles        |              |                |
| Q1 (< 55 mmHg)                      | 139          | 21.6% (30)     |
| Q2 (55-64 mmHg)                     | 139          | 23.7% (33)     |
| Q3 (65-76 mmHg)                     | 130          | 23.1% (30)     |
| Q4 (> 76 mmHg)                      | 155          | 22.6% (35)     |
| Diabetes                            |              |                |
| Absent                              | 500          | 22.8% (114)    |
| Present                             | 63           | 22.2% (14)     |
| BMI, as quartiles                   |              |                |
| Q1 (< 24.39 kg/m <sup>2</sup> )     | 152          | 21.7% (33)     |
| Q2 (24.39-26.95 kg/m <sup>2</sup> ) | 132          | 20.5% (27)     |
| Q3 (26.96-29.68 kg/m <sup>2</sup> ) | 146          | 25.3% (37)     |
| Q4 (> 29.68 kg/m <sup>2</sup> )     | 133          | 23.3% (31)     |
| Total Cholesterol, as quartiles     |              |                |
| Q1 (< 4.9 mmol/L)                   | 152          | 24.3% (37)     |
| Q2 (4.9-5.5 mmol/L)                 | 121          | 20.7% (25)     |
| Q3 (5.6-6.3 mmol/L)                 | 145          | 23.5% (34)     |
| Q4 (> 6.3 mmol/L)                   | 145          | 22.1% (32)     |
| HDL Cholesterol, as quartiles       |              |                |
| Q1 (< 1.27 mmol/L)                  | 118          | 22.9% (27)     |
| Q2 (1.28-1.52 mmol/L)               | 153          | 19.6% (30)     |
| Q3 (1.53-1.83 mmol/L)               | 136          | 25.0% (34)     |
| Q4 (> 1.83 mmol/L)                  | 156          | 23.7% (37)     |
| C-Reactive Protein                  |              |                |
| Low (< 1 mg/L)                      | 133          | 18.8% (25)     |
| Moderate (1-3 mg/L)                 | 262          | 23.7% (62)     |
| High (> 3 mg/L)                     | 168          | 24.4% (41)     |

AGES=Age, Gene/Environment Susceptibility-Reykjavik Study; AMD=age-related macular degeneration; BMI=body mass index;

HDL=high-density lipoprotein

Progression defined as exhibiting early AMD at baseline examination but exhibiting late AMD at the follow-up examination.

\* Participants exhibited early AMD at baseline examination.
